# Supplementary material
Source: Springer Nature journal article supplement (https://www.springermedizin.de/resource/supplementary/12245_2010_67_MOESM1_ESM.pdf/9672704)
Supplement: MOESM1 [file 9672704]

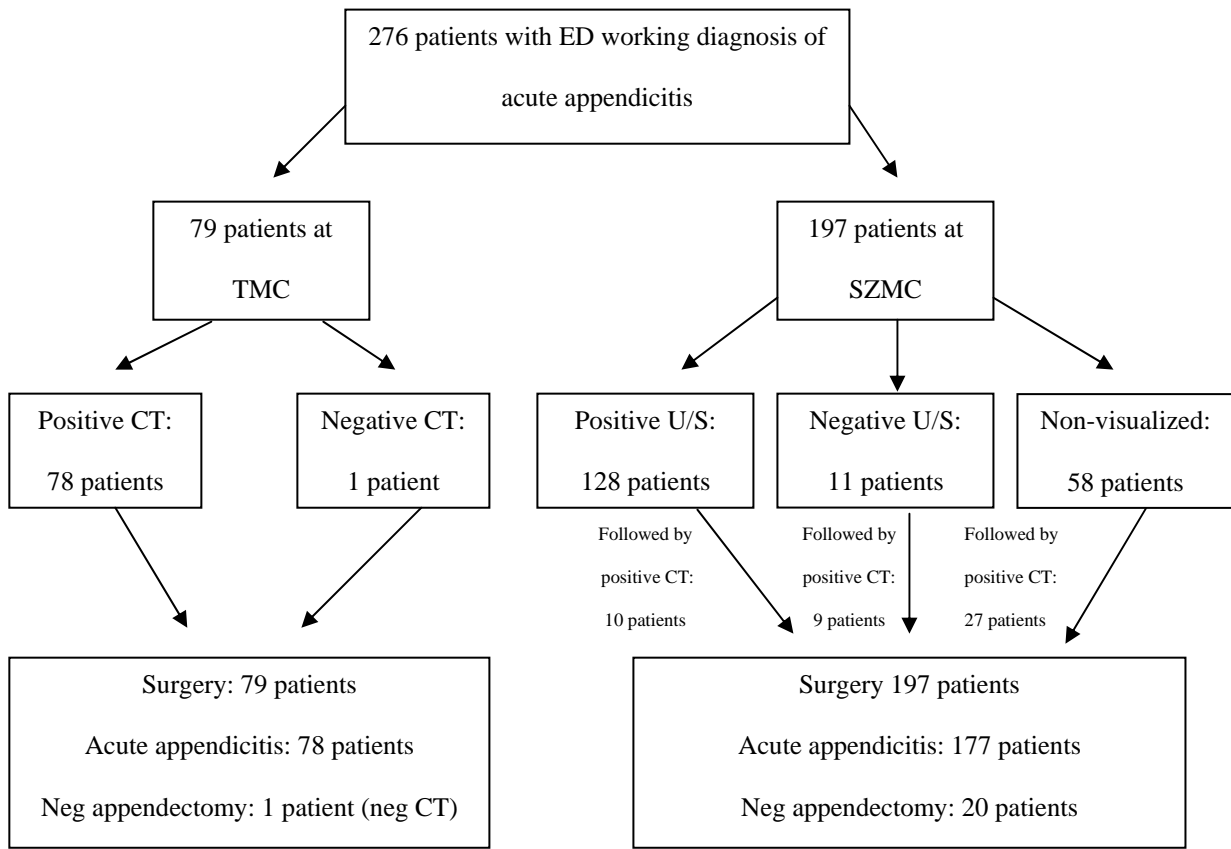

|                                |                               |                                 |
|--------------------------------|-------------------------------|---------------------------------|
| <u>Positive U/S only (118)</u> | <u>Negative U/S only (2)</u>  | <u>Non-visualized only (31)</u> |
| AA: 112 patients               | AA: 2 patients                | AA: 21 patients                 |
| NA: 6 patients                 | NA: 0 patients                | NA: 10 patients                 |
| <u>Positive U/S, + CT (10)</u> | <u>Negative U/S, + CT (9)</u> | <u>Non-visualized, +CT (27)</u> |
| AA: 9 patients                 | AA: 9 patients                | AA: 24 patients                 |
| NA: 1 patient                  | NA: 0 patients                | NA: 3 patients                  |
| <u>Total</u>                   | <u>Total</u>                  | <u>Total</u>                    |
| AA: 121 patients               | AA: 11 patients               | AA: 45 patients                 |
| NA: 7 patients                 | NA: 0 patients                | NA: 13 patients                 |
